# Supplementary material
Source: PubMed Central journal article supplement (PMC4835520)
Supplement: 439_2016_1656_MOESM3_ESM.pdf [file 439_2016_1656_MOESM3_ESM.pdf]

**Supplementary table 7. Sequencing throughput**

| <b>Run</b> | <b>Chip loading (%)</b> | <b>Usable reads (M)</b> | <b>Samples</b> | <b>Throughput (Gb)</b> | <b>Sequencing Chemistry</b> | <b>Chip version</b> |
|------------|-------------------------|-------------------------|----------------|------------------------|-----------------------------|---------------------|
| Run1_2013  | 79                      | 68.2                    | 1              | 9                      | v2                          | v2                  |
| Run2_2013  | 76                      | 53.7                    | 2              | 8.2                    | v2                          | v2                  |
| Run3_2013  | 91                      | 82.9                    | 2              | 12.3                   | v2                          | v2                  |
| Run4_2013  | 88                      | 70.6                    | 3              | 11.5                   | v2                          | v2                  |
| Run5_2013  | 86                      | 71.3                    | 3              | 11.1                   | v2                          | v2                  |
| Run6_2013  | 78                      | 71.3                    | 2              | 12.1                   | v2                          | v2                  |
| Run7_2013  | 65                      | 48.1                    | 2              | 7.9                    | v2                          | v2                  |
| Run8_2013  | 58                      | 42.6                    | 2              | 6.1                    | v2                          | v2                  |
| Run9_2013  | 64                      | 52.5                    | 4              | 8.6                    | v2                          | v2                  |
| Run10_2013 | 63                      | 51                      | 4              | 7.8                    | v2                          | v2                  |
| Run11_2014 | 75                      | 65.3                    | 3              | 9.9                    | v2                          | v2                  |
| Run12_2014 | 73                      | 51.1                    | 2              | 7.4                    | v2                          | v2                  |
| Run13_2014 | 75                      | 58.5                    | 2              | 9.9                    | v2                          | v2                  |
| Run14_2014 | 74                      | 60.1                    | 2              | 9.9                    | v2                          | v2                  |
| Run15_2014 | 75                      | 53                      | 2              | 8.2                    | v2                          | v2                  |
| Run16_2014 | 88                      | 76                      | 2              | 12.6                   | v3                          | v2                  |
| Run17_2014 | 81                      | 75.6                    | 2              | 10.3                   | v3                          | v2                  |
| Run18_2014 | 81                      | 71.5                    | 2              | 10.1                   | v3                          | v2                  |
| Run19_2014 | 86                      | 76.6                    | 2              | 12.1                   | v3                          | v2                  |
| Run20_2014 | 85                      | 88                      | 2              | 13.8                   | v3                          | v2                  |
| Run21_2014 | 82                      | 68.4                    | 2              | 10.6                   | v3                          | v2                  |
| Run22_2015 | 84                      | 73.8                    | 1              | 10.9                   | v3                          | v2                  |
| Run23_2015 | 90                      | 93.2                    | 1              | 16.6                   | HiQ                         | v3                  |
| Run24_2015 | 88                      | 94.1                    | 2              | 17.7                   | HiQ                         | v3                  |
| Run25_2015 | 91                      | 95.6                    | 2              | 17.9                   | HiQ                         | v3                  |
| Run26_2015 | 88                      | 93.4                    | 2              | 16.6                   | HiQ                         | v3                  |
| Run27_2015 | 85                      | 86.8                    | 2              | 16.1                   | HiQ                         | v3                  |

**Supplementary table 8. Sequencing results for each sample**

| Sample | Gb  | Mean coverage | % of bases covered $\geq$ 20X | Variants | Mapped reads | On target reads (%) | Coverage uniformity (%) | IQR |
|--------|-----|---------------|-------------------------------|----------|--------------|---------------------|-------------------------|-----|
| S1     | 9.2 | 148           | 94.4                          | 52882    | 53895205     | 92.9                | 91.8                    | 128 |
| S2     | 5.1 | 81            | 87.2                          | 51835    | 29600331     | 91.7                | 89.5                    | 72  |
| S3     | 5.7 | 87            | 84.8                          | 50017    | 36717647     | 86.3                | 86.7                    | 85  |
| S4     | 4.6 | 73            | 72.1                          | 42555    | 29670536     | 90.5                | 76.1                    | 93  |
| S5     | 7.7 | 117           | 90.0                          | 51714    | 49810202     | 86.0                | 88.6                    | 108 |
| S6     | 5.7 | 88            | 76.6                          | 44370    | 36600843     | 89.9                | 78.0                    | 108 |
| S7     | 5.6 | 85            | 79.9                          | 48782    | 35917358     | 85.5                | 82.3                    | 89  |
| S8     | 5.9 | 91            | 87.4                          | 50724    | 37579354     | 87.5                | 88.6                    | 85  |
| S9     | 5.7 | 87            | 88.1                          | 51092    | 41837419     | 85.7                | 89.7                    | 77  |
| S10    | 5.2 | 81            | 86.2                          | 49919    | 38212766     | 89.7                | 88.6                    | 75  |
| S11    | 5.1 | 78            | 83.0                          | 49791    | 36876134     | 88.7                | 86.9                    | 74  |
| S12    | 5.8 | 92            | 90.5                          | 51795    | 33823693     | 93.1                | 91.3                    | 80  |
| S13    | 7.5 | 118           | 93.6                          | 54127    | 51125018     | 87.2                | 92.4                    | 99  |
| S14    | 5.4 | 85            | 88.7                          | 50087    | 31817461     | 91.7                | 90.2                    | 76  |
| S15    | 2.7 | 42            | 74.5                          | 48677    | 18026501     | 86.8                | 91.4                    | 37  |
| S16    | 3.3 | 51            | 81.7                          | 49376    | 21724373     | 87.2                | 92.1                    | 43  |
| S17    | 7.6 | 117           | 90.1                          | 51578    | 48782010     | 87.7                | 88.4                    | 112 |
| S18    | 4.3 | 67            | 78.3                          | 48137    | 13299662     | 88.6                | 85.9                    | 63  |
| S19    | 8.3 | 131           | 92.1                          | 52126    | 50148863     | 90.1                | 90.2                    | 116 |
| S20    | 7.6 | 122           | 92.8                          | 53154    | 47904878     | 91.0                | 91.4                    | 105 |
| S21    | 5.9 | 92            | 92.1                          | 53415    | 40903034     | 86.4                | 92.8                    | 76  |
| S22    | 8.3 | 130           | 94.0                          | 53586    | 52623486     | 89.0                | 92.1                    | 110 |
| S23    | 3.4 | 53            | 83.6                          | 50378    | 23254998     | 86.5                | 92.4                    | 44  |
| S24    | 6.1 | 94            | 90.8                          | 52419    | 36958853     | 88.4                | 91.4                    | 79  |
| S25    | 3.9 | 58            | 85.0                          | 51096    | 27325623     | 83.1                | 92.2                    | 48  |
| S26    | 3.8 | 60            | 84.2                          | 50337    | 25188336     | 87.8                | 91.6                    | 51  |
| S27    | 4.7 | 74            | 86.4                          | 51034    | 27835836     | 90.5                | 89.9                    | 67  |
| S28    | 7.2 | 114           | 92.1                          | 52073    | 43770847     | 90.7                | 91.1                    | 98  |
| S29    | 3.6 | 59            | 78.1                          | 48097    | 23444306     | 92.4                | 87.9                    | 55  |
| S30    | 4.4 | 71            | 82.1                          | 48427    | 28066337     | 93.4                | 87.7                    | 71  |
| S31    | 5.2 | 82            | 86.0                          | 51218    | 34902958     | 89.5                | 89.4                    | 77  |
| S32    | 6.9 | 107           | 93.0                          | 52597    | 45664724     | 87.4                | 94.1                    | 90  |
| S33    | 6.9 | 106           | 91.2                          | 51414    | 46264665     | 88.4                | 90.6                    | 93  |
| S34    | 6.0 | 95            | 90.2                          | 51444    | 39228833     | 88.5                | 92.6                    | 84  |

Coverage uniformity indicates the % of bases in the target regions with a read depth at least 20 % of the average sample coverage. IQR report Inter-Quartile Range of base coverage.
